# Supplementary material for: Greyscale and Paper Electrochromic Polymer Displays by UV Patterning
Source: MDPI journal article supplement (doi:10.3390/polym11020267), 2019-02-05
Supplement: s1 [file s1]

# Greyscale and Paper Electrochromic Polymer Displays by UV Patterning

Robert Brooke<sup>1,2</sup>, Jesper Edberg<sup>1,2</sup>, Xavier Crispin<sup>1</sup>, Magnus Berggren<sup>1</sup>, Isak Engquist<sup>1</sup>, Magnus P. Jonsson<sup>1\*</sup>

<sup>1</sup> Linköping University, Department of Science and Technology, Laboratory of Organic Electronics, SE-601 74 Norrköping, Sweden

<sup>2</sup> RISE Acreo, ICT Department, Printed Electronics, Research Institutes of Sweden, Acreo, 601 17, Norrköping Sweden

\* Correspondence: [magnus.jonsson@liu.se](mailto:magnus.jonsson@liu.se)

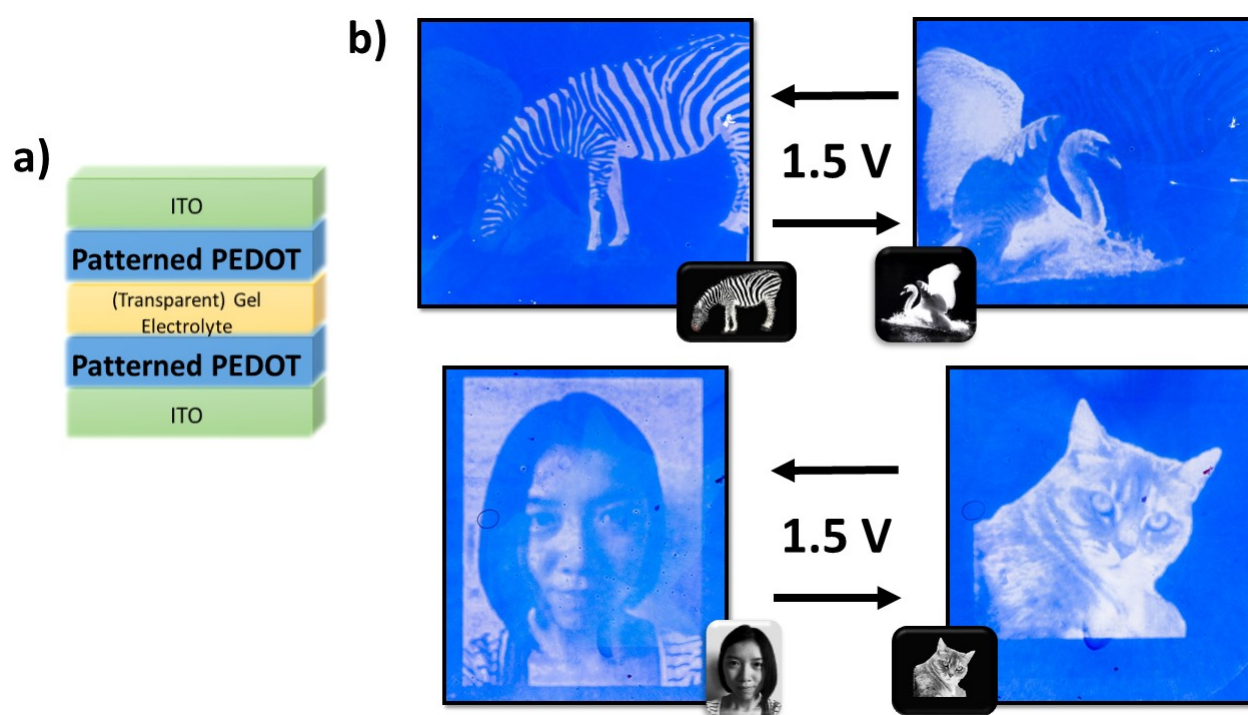

**Figure S1.** Electrochromic device architecture and further examples of complex patterns within electrochromic devices.

**Table SII.** Complete L\*a\*b\* color space values of the as prepared, oxidized and reduced pristine PEDOT and UV-light treated PEDOT with the oxidant concentration varied.

| Sample                        | Redox state | L*    | a*    | b*      |
|-------------------------------|-------------|-------|-------|---------|
| <b>Pristine PEDOT</b>         |             |       |       |         |
| 6 wt%                         | As prepared | 71.15 | -3.72 | -11.62  |
| 6 wt%                         | Oxidized    | 71.86 | -3.94 | -9.34   |
| 6 wt%                         | Reduced     | 59.94 | 0.46  | -14.91  |
| 12 wt%                        | As prepared | 49.41 | -6.07 | -28.09  |
| 12 wt%                        | Oxidized    | 52.9  | -4.94 | -27.24  |
| 12 wt%                        | Reduced     | 28.9  | 16.68 | -53.53  |
| 21 wt%                        | As prepared | 23.7  | -4.97 | -36.72  |
| 21 wt%                        | Oxidized    | 27.0  | -1.69 | -38.02  |
| 21 wt%                        | Reduced     | 3.09  | 31.12 | -38.02  |
| <b>UV-light treated PEDOT</b> |             |       |       |         |
| 6 wt%                         | As prepared | 68.72 | -0.04 | -0.86   |
| 6 wt%                         | Oxidized    | 68.49 | 0.26  | 0.09    |
| 6 wt%                         | Reduced     | 68.45 | 0.38  | -0.63   |
| 12 wt%                        | As prepared | 44.16 | -1.43 | -6.32   |
| 12 wt%                        | Oxidized    | 46.93 | -3.22 | -2.17   |
| 12 wt%                        | Reduced     | 35.52 | 4.49  | -8.25   |
| 21 wt%                        | As prepared | 15.29 | -4.06 | -12a.74 |
| 21 wt%                        | Oxidized    | 10.3  | 5.32  | -5.77   |
| 21 wt%                        | Reduced     | 8.45  | 7.15  | -7.66   |
